# Supplementary material for: Introduction of sidewall CN: a high-temperature-resistant COF for lithium-ion storage
Source: Royal Society of Chemistry journal article supplement (doi:10.1039/d4tc04275a), 2024-12-06
Supplement: d4tc04275a1.pdf [file d4tc04275a1.pdf]

## Supporting Information

# Introduction of Sidewall C≡N: High-temperature-resistant COF for Lithium-ion Storage

*Jiahui Yuan,<sup>a</sup> Zhenyu Zhang,<sup>b</sup> Yajie Feng,<sup>c</sup> Fuzhou Chen,<sup>a</sup> Wei Ding,<sup>d</sup> Yizi Zhang,<sup>a</sup> Hongxing Jia,<sup>b\*</sup> Zhengrong Gu<sup>a\*</sup>*

<sup>a</sup>. Department of Agricultural and Biosystems Engineering, South Dakota State University, Brookings, SD, 57007, USA.

<sup>b</sup>. College of Materials Science and Engineering, National Engineering Research Center for Magnesium Alloys, Chongqing University, Chongqing 400044, China.

<sup>c</sup>. College of Physics and Center of Quantum Materials and Devices, Chongqing University, Chongqing 401331, China.

<sup>d</sup>. Department of Electrical Engineering and Computer Science, South Dakota State University, Brookings, SD 57007, USA.

## 1. Material characterization

The morphology of the samples was characterized using Scanning Electron Microscopy (SEM, Thermo Fisher Scientific Quattro S) and Transmission Electron Microscopy (TEM, Thermo Fisher Scientific Talos F200S), with High-Angle Annular Dark Field Scanning Transmission Electron Microscopy (HAADF-STEM) images and corresponding Energy Dispersive X-ray Spectroscopy (EDS) mapping acquired using a FEI Titan Themis. X-ray diffraction (XRD) patterns were recorded using a PANalytical X'Pert Powder diffractometer equipped with Cu-K $\alpha$  radiation (40 kV, 40 mA), at a scan rate of 5° min<sup>-1</sup> and a 2 $\theta$  angle range from 5° to 90°. Surface composition was analyzed using X-ray Photoelectron Spectroscopy (XPS) on a Thermo Fisher Scientific ESCALAB 250Xi, with all spectra calibrated to a C1s peak at 284.8 eV. Nitrogen adsorption-desorption isotherms were measured using Micromeritics analyzer (ASAP2460) to calculate the specific surface area and pore size distribution. Fourier-transform infrared (FT-IR) spectroscopy measurements were conducted using Thermo Fisher Scientific instrument (Nicolet iS10). Raman spectra were collected using HORIBA Jobin Yvon S.A.S. Raman spectrometer (LabRAM HR Evolution).

## 2. Electrochemical measurements

The electrochemical performances of the samples are evaluated in CR2032-type coin cells. The working electrodes were made up of active material, conducting carbon and polyvinylidene fluoride (PVDF) binder (the ratio of 8:1:1), formed with NMP solvent, coated on copper foil. The as-prepared working electrodes were dried in a vacuum oven at 80°C for 12 h. The average loading mass of these active materials was about 0.8 mg cm<sup>-2</sup>. In Li-ion batteries (LIBs), lithium foil acts as counter electrode and reference electrode, Celgard 2320 acts as separator, and 1 M LiPF<sub>6</sub> in ethylene carbonate (EC)/dimethyl carbonate (DMC)/ethyl methyl carbonate (EMC) (1:1:1 wt %)

with 5% fluoroethylene carbonate (FEC) acts as electrolyte. The cycling and rate performance was tested on a LANHE battery test system (CT3002A, Wuhan Land Electronics Co., Ltd.) with a voltage ranging from 0.01-3.0 V. The cyclic voltammetry (CV) curves were recorded within a voltage window of 0.01–3.0 V at various scan rates using an electrochemical workstation (CHI-760E, Shanghai Chen Hua Instrument Co., Ltd.). The electrochemical impedance spectroscopy (EIS) was performed at a frequency ranging from 0.01 Hz to 100 kHz using CHI-760E electrochemical workstation. All measurements were conducted at room temperature.

### 3. Lithium-Ion Diffusion Analysis by EIS

To calculate the lithium-ion diffusion coefficient using EIS, the following equation (1) was applied<sup>1</sup>.

$$D = 0.5 \left( \frac{RT}{n^2 F^2 A C A_w} \right)^2 \quad (1)$$

where  $D$  is the lithium-ion diffusion coefficient,  $R$  is the gas constant,  $T$  is the absolute temperature,  $n$  is the number of reacting electrons,  $F$  is the Faraday's constant,  $A$  is the area of the cathode/electrolyte interface (1.54 cm<sup>2</sup> in this work),  $C$  is the concentration of lithium-ion, and  $A_w$  is the Warburg factor which has relationship with  $Z'$ :

$$Z' = R_s + R_{ct} + A_w \omega^{-\frac{1}{2}} \quad (2)$$

where  $\omega$  is the angular frequency ( $\omega=2\pi f$ ).

The calculated lithium-ion diffusion coefficients for NPC<sub>700</sub>, NPC<sub>800</sub>, and NPC<sub>900</sub> before cycling are  $2.5 \times 10^{-13}$  cm<sup>2</sup> s<sup>-1</sup>,  $4.1 \times 10^{-13}$  cm<sup>2</sup> s<sup>-1</sup> and  $1.9 \times 10^{-13}$  cm<sup>2</sup> s<sup>-1</sup>, respectively. After cycling, the lithium-ion diffusion coefficients for NPC<sub>700</sub>, NPC<sub>800</sub>, and NPC<sub>900</sub> are  $5.2 \times 10^{-13}$  cm<sup>2</sup> s<sup>-1</sup>,  $2.5 \times 10^{-13}$  cm<sup>2</sup> s<sup>-1</sup> and  $6.5 \times 10^{-13}$  cm<sup>2</sup> s<sup>-1</sup>, respectively. NPC<sub>900</sub> demonstrates a significantly higher lithium-ion

diffusion coefficient than NPC<sub>700</sub> and NPC<sub>800</sub> after cycling. Additionally, Fig. S8 and S9 illustrate the relationship between  $Z'$  and  $\omega^{-1/2}$  at low frequency regions of NPC<sub>700</sub>, NPC<sub>800</sub>, and NPC<sub>900</sub>.

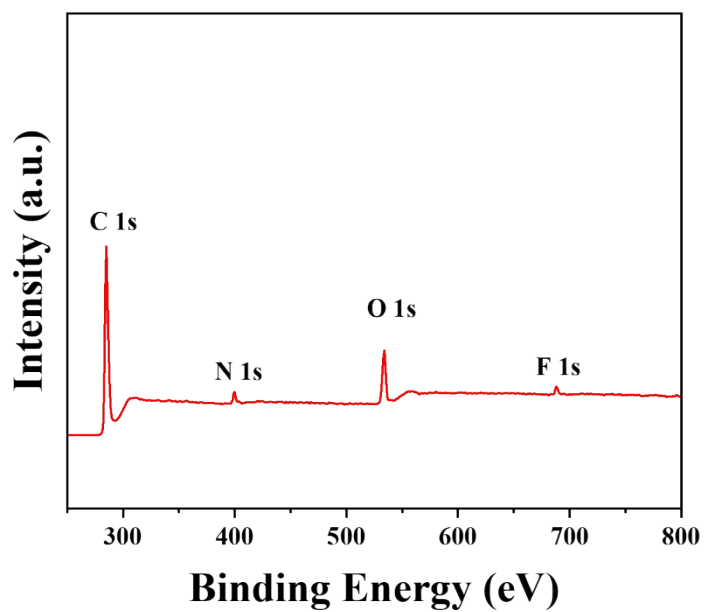

**Figure S1.** XPS survey spectra of COF-HHTP-CN.

**Table. S1.** The surface area retention of NPC<sub>700</sub> and other N-rich COFs derived NPC materials in literature.

| Materials              | Pyrolysis temperature /°C | Surface area                                     | Surface area                                    | Surface area retention | Ref.      |
|------------------------|---------------------------|--------------------------------------------------|-------------------------------------------------|------------------------|-----------|
|                        |                           | before pyrolysis /m <sup>2</sup> g <sup>-1</sup> | after pyrolysis /m <sup>2</sup> g <sup>-1</sup> |                        |           |
| NPC <sub>700</sub>     | 700                       | 531.7                                            | 358.8                                           | 67.5%                  | This work |
| NC-700                 | 700                       | 601.4                                            | 52.4                                            | 8.7%                   | 2         |
| graphenic carbon       | 370                       | 1290                                             | 517                                             | 40.1%                  | 3         |
| N doped carbon         | /                         | 2067                                             | 150                                             | 7.3%                   | 4         |
| COF <sub>700</sub>     | 700                       | 1189                                             | 561                                             | 47.2%                  | 5         |
| Co-CM-5                | 600                       | 1458                                             | 244                                             | 16.7%                  | 6         |
| Co@COF <sub>0</sub>    | 700                       | 2143.54                                          | 573.11                                          | 26.7%                  | 7         |
| Co-C500 <sub>COF</sub> | 500                       | 717.94                                           | 351.89                                          | 49.0%                  | 8         |
| NC-700                 | 700                       | 999                                              | 408                                             | 40.8%                  | 9         |

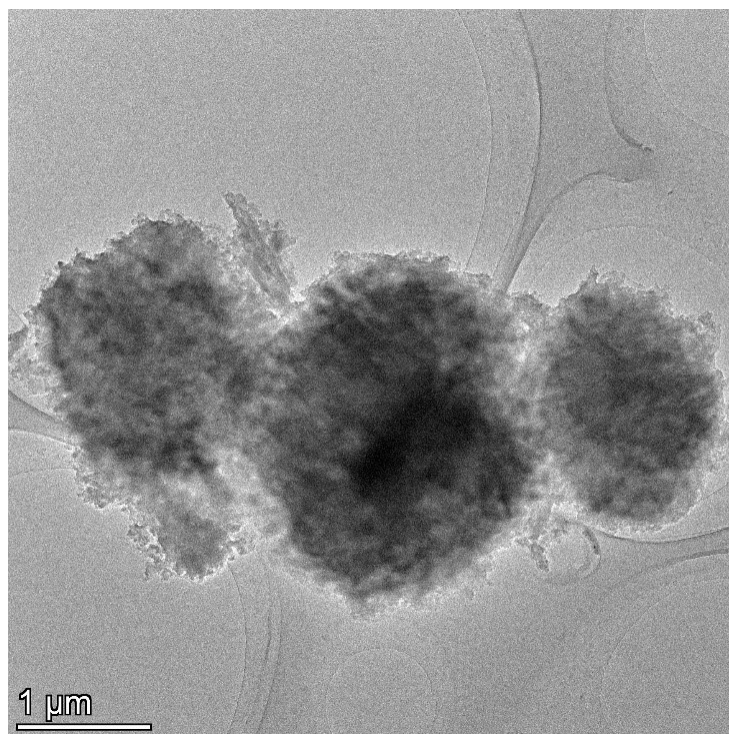

**Figure S2.** TEM image of COF-HHTTP-CN.

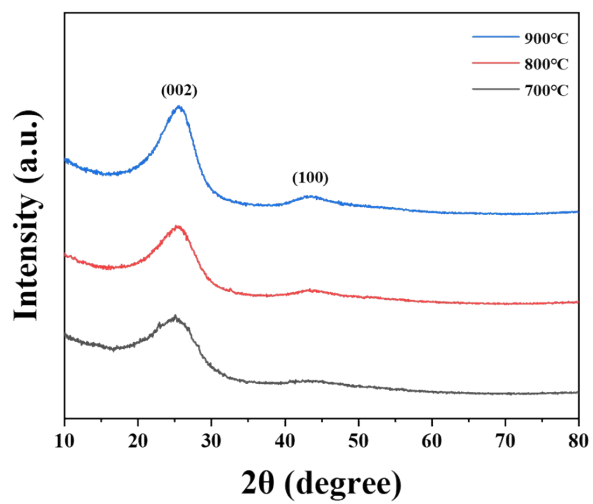

**Figure S3.** XRD spectra of NPC<sub>700</sub>, NPC<sub>800</sub>, and NPC<sub>900</sub>.

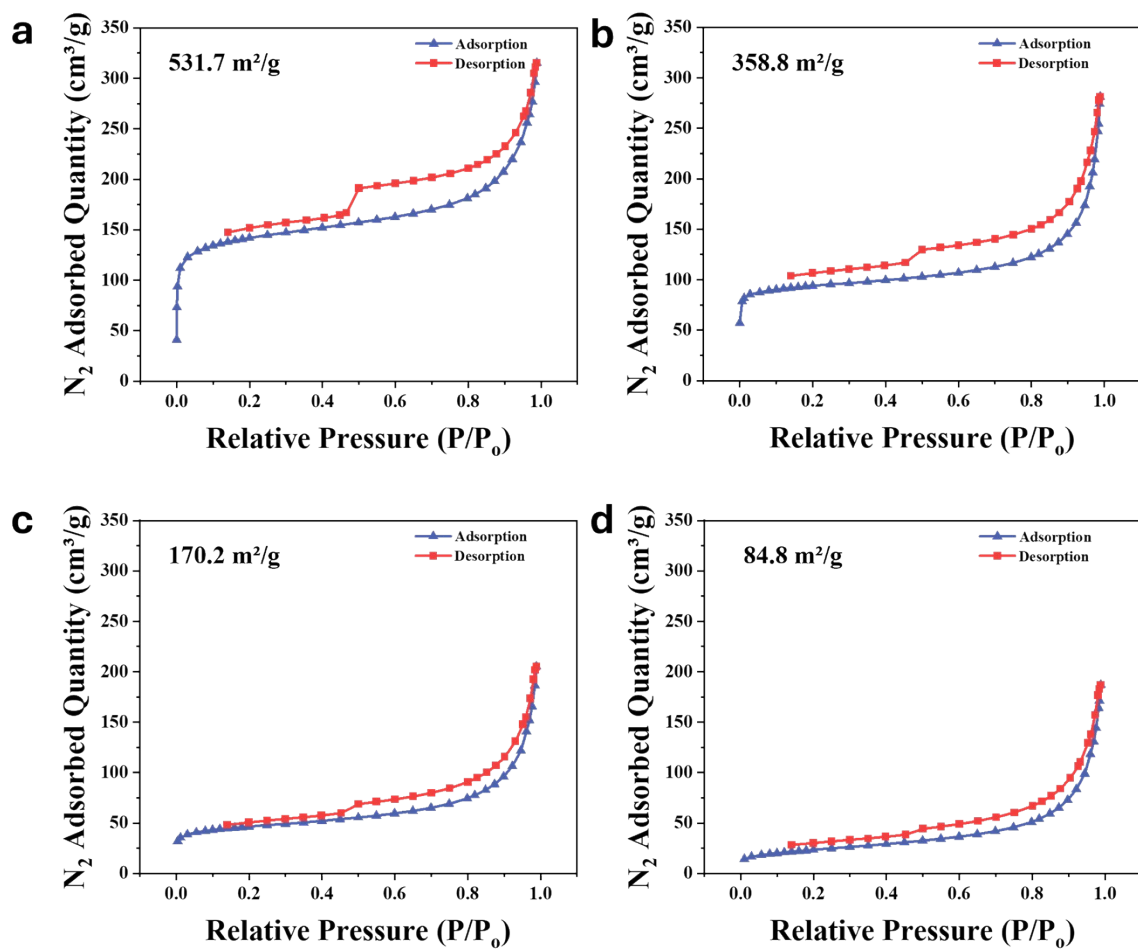

**Figure S4.** (a-d)  $N_2$  adsorption/desorption isotherms of COF-HHTTP-CN, NPC<sub>700</sub>, NPC<sub>800</sub> and NPC<sub>900</sub>.

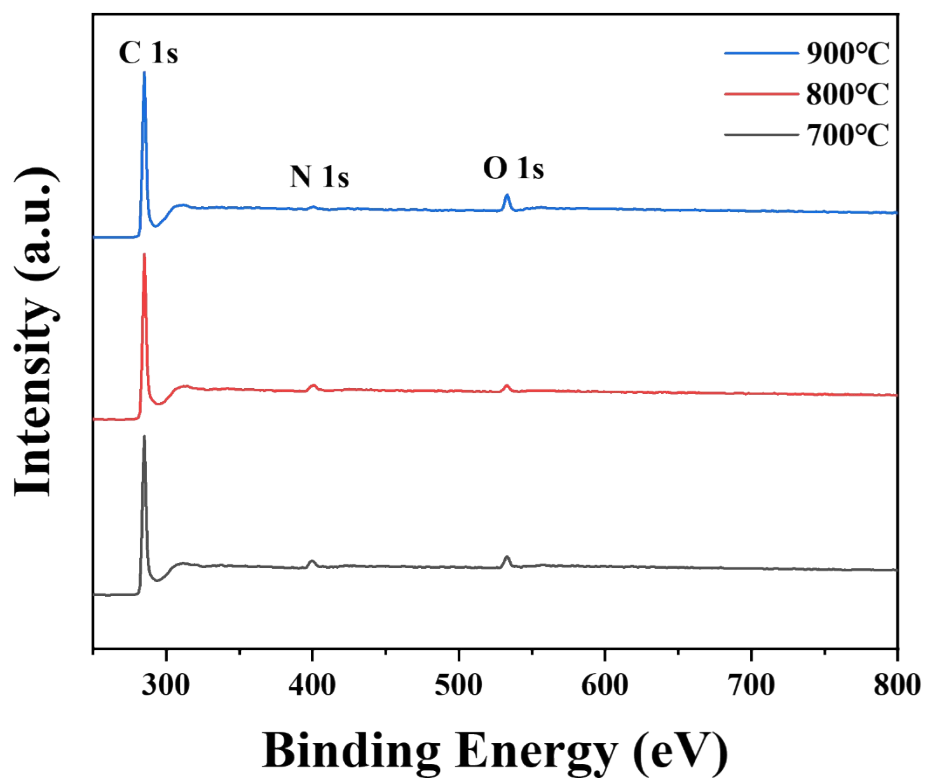

Figure S5. XPS survey of NPC<sub>700</sub>, NPC<sub>800</sub>, and NPC<sub>900</sub>.

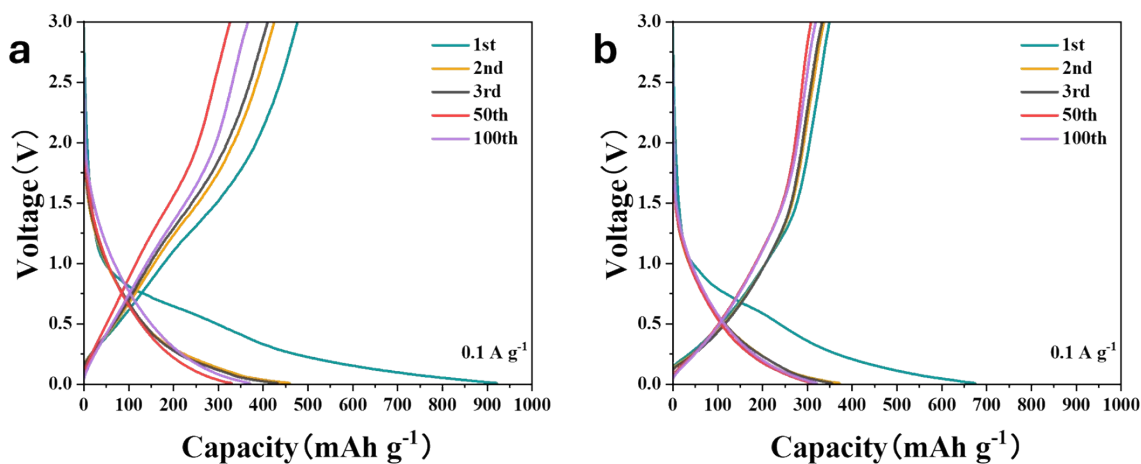

Figure S6. Galvanostatic charge-discharge tests of (a) NPC<sub>700</sub> and (b) NPC<sub>900</sub> at 0.1 A g<sup>-1</sup>.



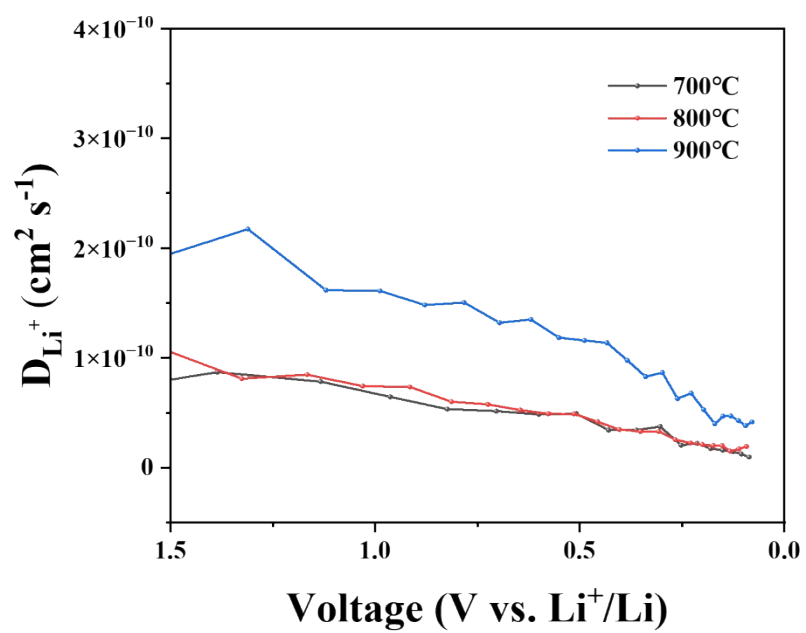

**Figure S7.** The lithium-ion diffusion coefficient of NPC<sub>700</sub>, NPC<sub>800</sub> and NPC<sub>900</sub> in the discharging process.

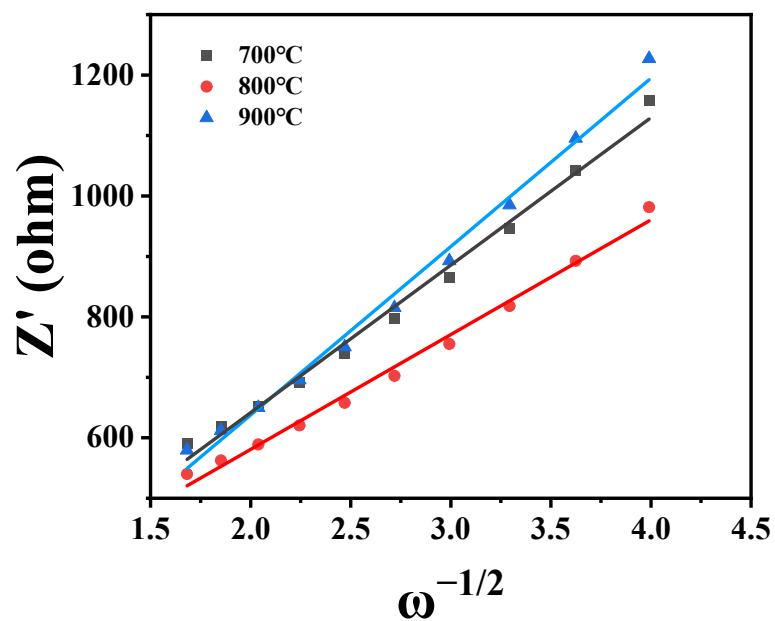

**Figure S8.** The relationship between  $Z'$  and  $\omega^{-1/2}$  at low frequency regions of NPC<sub>700</sub>, NPC<sub>800</sub> and NPC<sub>900</sub> before cycling. The calculated lithium-ion diffusion coefficients for NPC<sub>700</sub>, NPC<sub>800</sub>, and NPC<sub>900</sub> before cycling are  $2.5 \times 10^{-13} \text{ cm}^2 \text{ s}^{-1}$ ,  $4.1 \times 10^{-13} \text{ cm}^2 \text{ s}^{-1}$  and  $1.9 \times 10^{-13} \text{ cm}^2 \text{ s}^{-1}$ , respectively.

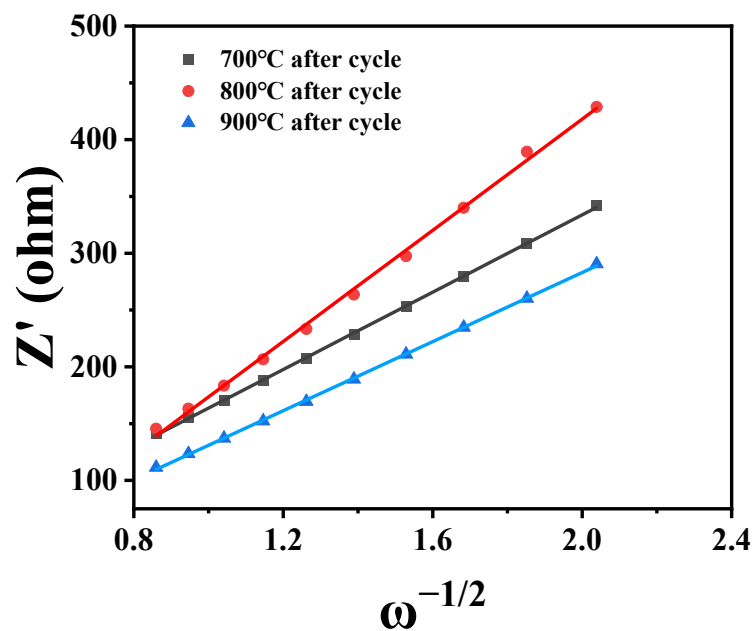

**Figure S9.** The relationship between  $Z'$  and  $\omega^{-1/2}$  at low frequency regions of NPC<sub>700</sub>, NPC<sub>800</sub> and NPC<sub>900</sub> after cycling. After cycling, the lithium-ion diffusion coefficient for NPC<sub>900</sub> is calculated to be  $6.5 \times 10^{-13} \text{ cm}^2 \text{ s}^{-1}$ , surpassing those of NPC<sub>700</sub> ( $5.2 \times 10^{-13} \text{ cm}^2 \text{ s}^{-1}$ ) and NPC<sub>800</sub> ( $2.5 \times 10^{-13} \text{ cm}^2 \text{ s}^{-1}$ ).

## References

1. L. Wang, J. Zhao, X. He, J. Gao, J. Li, C. Wan and C. Jiang, *Int. J. Electrochem. Sci.*, 2012, **7**, 345-353.
2. X. Hu, Y. Long, M. Fan, M. Yuan, H. Zhao, J. Ma and Z. Dong, *Appl. Catal., B*, 2019, **244**, 25-35.
3. D. Chakraborty, S. Nandi, R. Illathvalappil, D. Mullangi, R. Maity, S. K. Singh, S. Haldar, C. P. Vinod, S. Kurungot and R. Vaidhyanathan, *ACS Omega*, 2019, **4**, 13465-13473.
4. C. Yang, S. Maenosono, J. Duan and X. Zhang, *ChemNanoMat*, 2019, **5**, 957-963.
5. M. Liu, X. Zhu, Y. Song, G. Huang, J. Wei, X. Song, Q. Xiao, T. Zhao, W. Jiang, X. Li and W. Luo, *Adv. Funct. Mater.*, 2023, **33**, 2213395.
6. S. Liu, Y. Shuai, X. Qi, Z. Ding and Y. Liu, *Nano Res.*, 2024, **17**, 7068–7076.
7. M. Yao, M. Xie, S. Zhang, J. Yuan, L. Zhao and R.-S. Zhao, *Sep. Purif. Technol.*, 2022, **302**, 122145.
8. M. Cao, J. Lei, J. Zhang, L. Zhou and Y. Liu, *J. Cleaner Prod.*, 2022, **375**, 134114.
9. J. Lv, P. Hu, J. Zheng, S. Mo, W. Liu, S. Chen and Y. Liu, *J. Power Sources*, 2024, **602**, 234339.
